# Supplementary material
Source: MDPI journal article supplement (https://www.mdpi.com/search?q=insects-11-00597)
Supplement: s001 [file insects-11-00597-s001.pdf]

# Genome-wide Analysis of Peptidoglycan Recognition Protein Genes in Fig Wasps (Hymenoptera, Chalcidoidea)

Hong-Xia Hou <sup>1</sup>, Meng-Yuan Guo <sup>1</sup>, Jin Geng <sup>1</sup>, Xian-Qin Wei <sup>1</sup>, Da-Wei Huang <sup>1,2\*</sup>, Jin-Hua Xiao <sup>1\*</sup>

## Supplementary Materials:

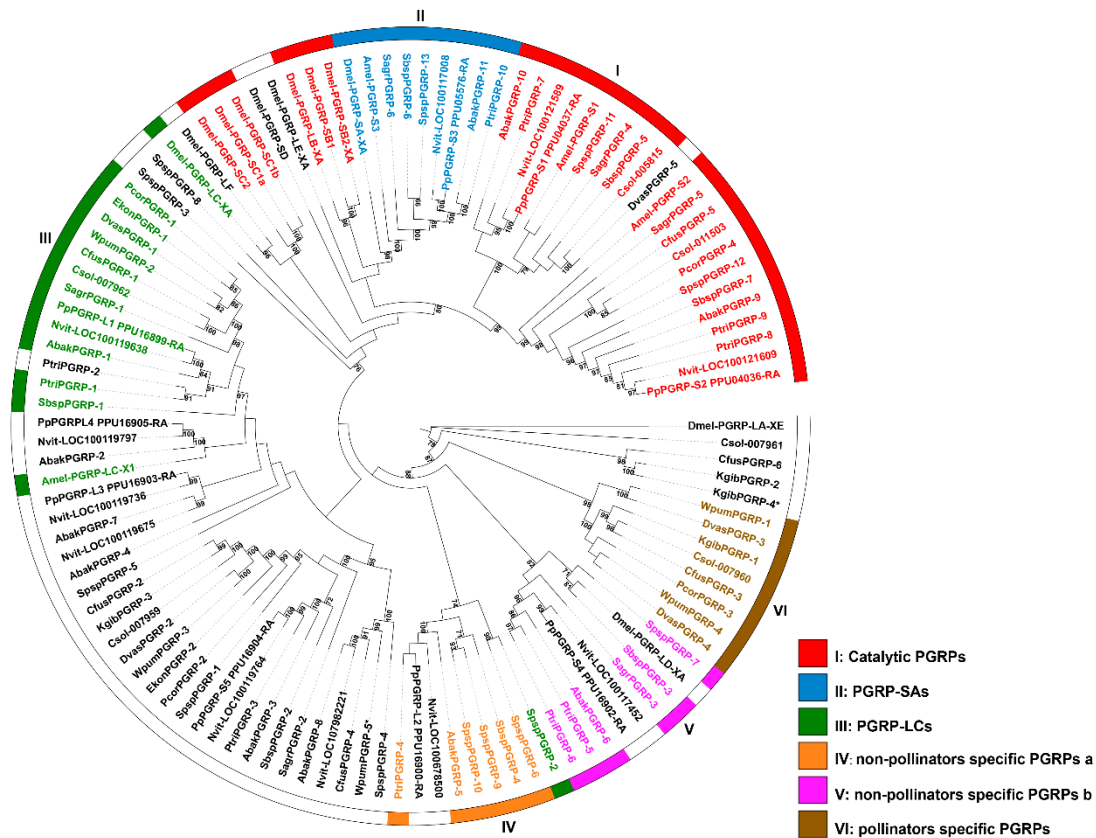

**Figure S1.** A gene tree of the PGRP genes. The PGRPs clustered with Dmel-PGRP-SA and Amel-PGRP-S3 were only from non-pollinators. All of the amino acid sequences of the PGRPs from species of *Drosophila melanogaster* (Dmel-), *Apis mellifera* (Amel-), *Nasonia vitripennis* (Nvit-), *Pteromalus puparum* (Pp) and 12 fig wasps were used for Maximum Likelihood (ML) tree construction, with the model of VT+R6. The red indicated PGRPs with catalytic activity, the blue indicated PGRPs associated with the initiation of Toll pathway, the green indicated PGRPs associated with the initiation of IMD pathway, the orange and purple indicated PGRPs with non-pollinator-specificity, and the brown indicated PGRPs with pollinator-specificity. \* represented the PGRP genes with an uncomplete domain in the C terminal or N terminal.

**Table S1.** The fig wasp species of pollinators and non-pollinators used in this study.

| <b>Group</b>    | <b>Name</b>                      | <b>Abbreviation</b> | <b>Diet</b>                  | <b>Oviposition location</b> |
|-----------------|----------------------------------|---------------------|------------------------------|-----------------------------|
| Pollinators     | <i>Ceratosolen solmsi</i>        | Csol                | phytophagous                 | inside figs                 |
|                 | <i>Kradibia gibbosae</i>         | Kgib                | phytophagous                 | inside figs                 |
|                 | <i>Wiebesia pumilae</i>          | Wpum                | phytophagous                 | inside figs                 |
|                 | <i>Ceratosolen fusciceps</i>     | Cfus                | phytophagous                 | inside figs                 |
|                 | <i>Dolichoris vasculosae</i>     | Dvas                | phytophagous                 | inside figs                 |
|                 | <i>Eupristina koningsbergeri</i> | Ekon                | phytophagous                 | inside figs                 |
|                 | <i>Platyscapa corneri</i>        | Pcor                | phytophagous                 | inside figs                 |
| Non-pollinators | <i>Sycobia</i> sp.2              | Sbsp                | phytophagous                 | outside figs                |
|                 | <i>Sycophila</i> sp.2            | Ssp                 | parasitic or<br>phytophagous | outside figs                |
|                 | <i>Sycophaga agragensis</i>      | Sagr                | phytophagous                 | outside figs                |
|                 | <i>Apocrypta bakeri</i>          | Abak                | parasitic or<br>phytophagous | outside figs                |
|                 | <i>Philotrypesis tridentata</i>  | Ptri                | parasitic or<br>phytophagous | outside figs                |
